# Supplementary material
Source: PubMed Central journal article supplement (PMC7442692)
Supplement: NIHMS1603543-supplement-2.pdf [file NIHMS1603543-supplement-2.pdf]

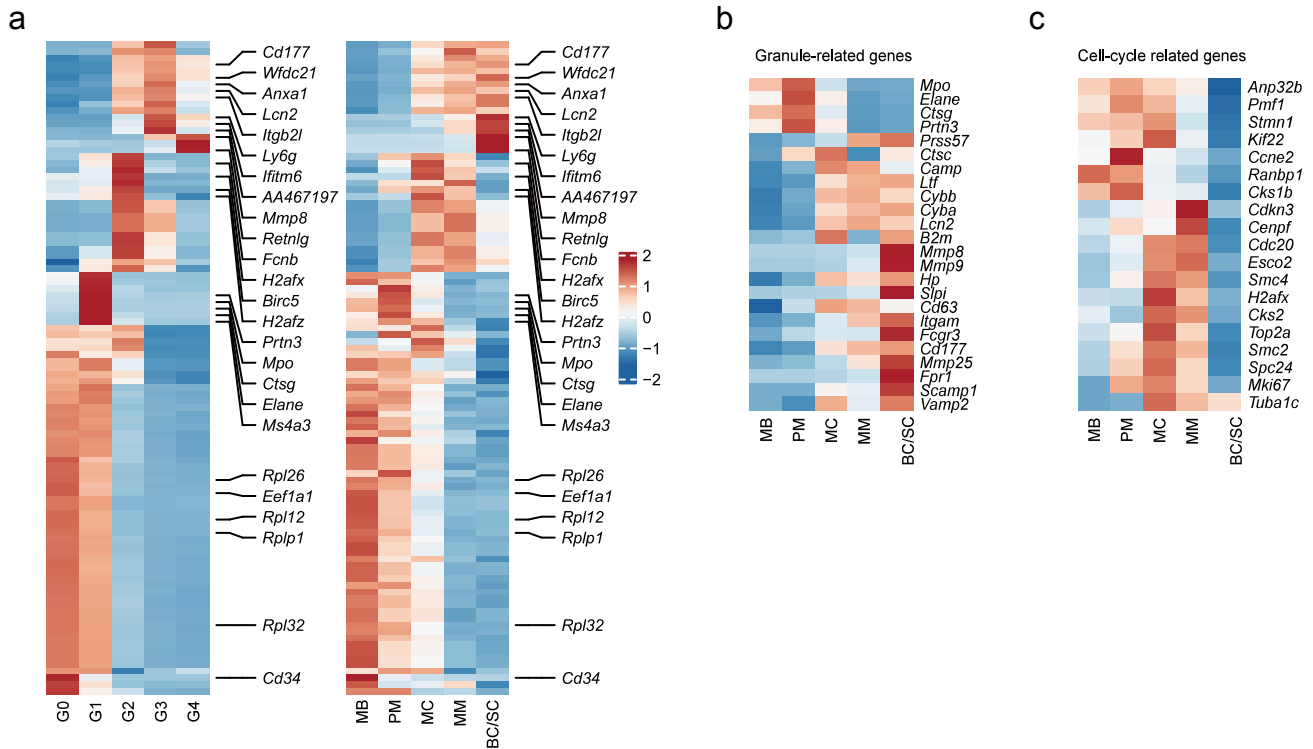

**Supplementary Fig. 1. scRNA-seq defined differentiating neutrophil populations correlated with classical morphology-defined neutrophil subpopulations. (a)** Heatmaps showing row-scaled expression of the 20 highest DEGs per cluster across averaged single-cell groups (left) and morphological groups (right). Only genes detected in both scRNA-seq data and bulk RNA-seq data are visualized. Representative genes are indicated. **(b,c)** Heatmaps showing row-scaled expression of granule-related genes (b) and cell-cycle related genes (c) for morphological groups.

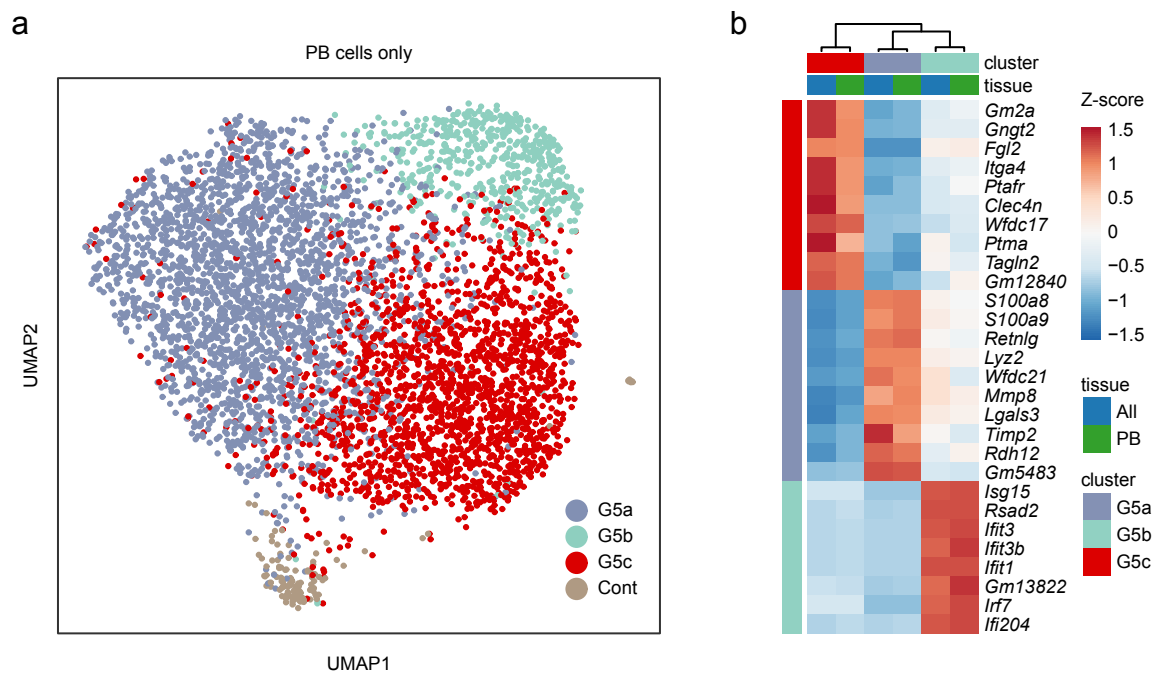

**Supplementary Fig. 2. Clustering of PB neutrophils only gave rise to the same three G5 subpopulations. (a)** UMAP of mouse PB neutrophils only. Cells were colored by their de novo-defined identity. **(b)** Heatmap showing row-scaled expression of the 10 highest differentially expressed genes (Fig. 2g) in G5 clusters defined in Fig. 1b (All) and in (a) (PB).

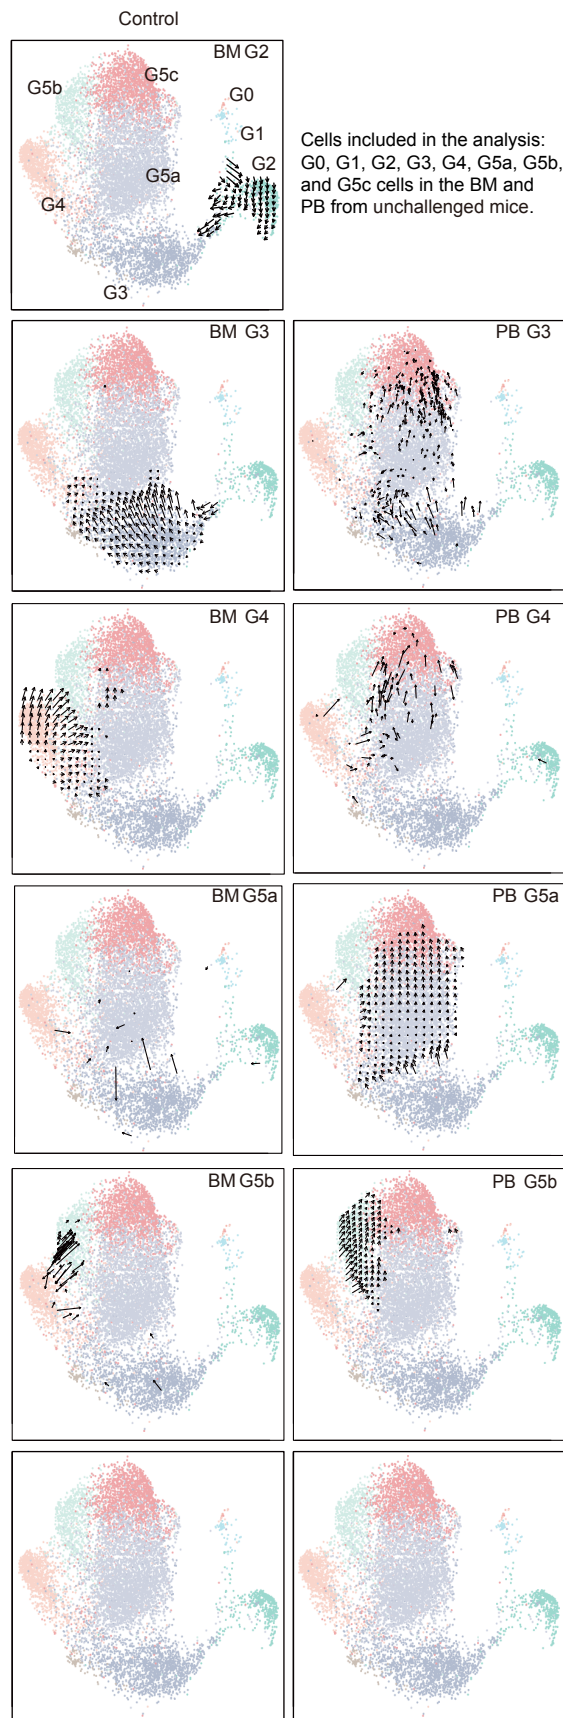

**Supplementary Fig. 3. Neutrophil dynamics under steady-state assessed by velocity analysis (all neutrophil populations were included for analysis).** Shown are dynamics (velocity field projected on the UMAP plot) of G2-G5 neutrophils under normal conditions. BM neutrophils (left) and PB neutrophils (right) are displayed separately. For small populations, velocity vectors of all cells are visualized directly. For large populations, a grid velocity summary is derived by calculating the Gaussian-weighted average of velocity vectors of all cells at each grid point. Only grid points adjacent to neutrophils in the target population are visualized..

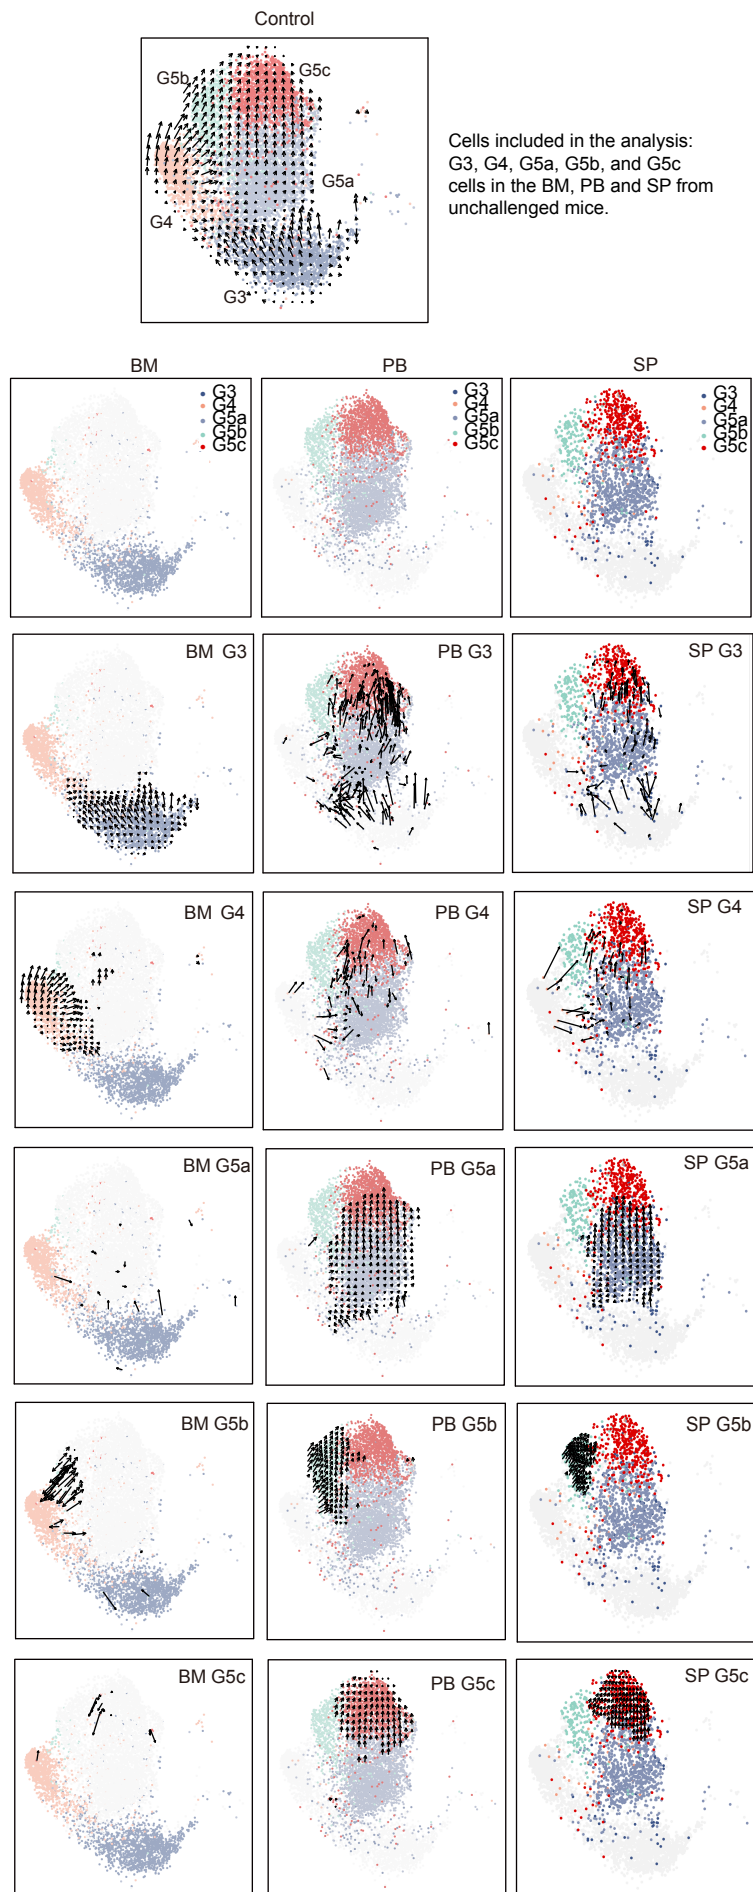

**Supplementary Fig. 4. Neutrophil dynamics under steady-state assessed by velocity analysis (Only G3-G5 neutrophil populations were included for analysis).** The RNA velocity analysis was conducted as described in supplementary Fig. 3. Only G3-G5 neutrophils from BM-Gr1+, PB-Gr1+, and SP-Gr1+ samples were utilized for the analysis.



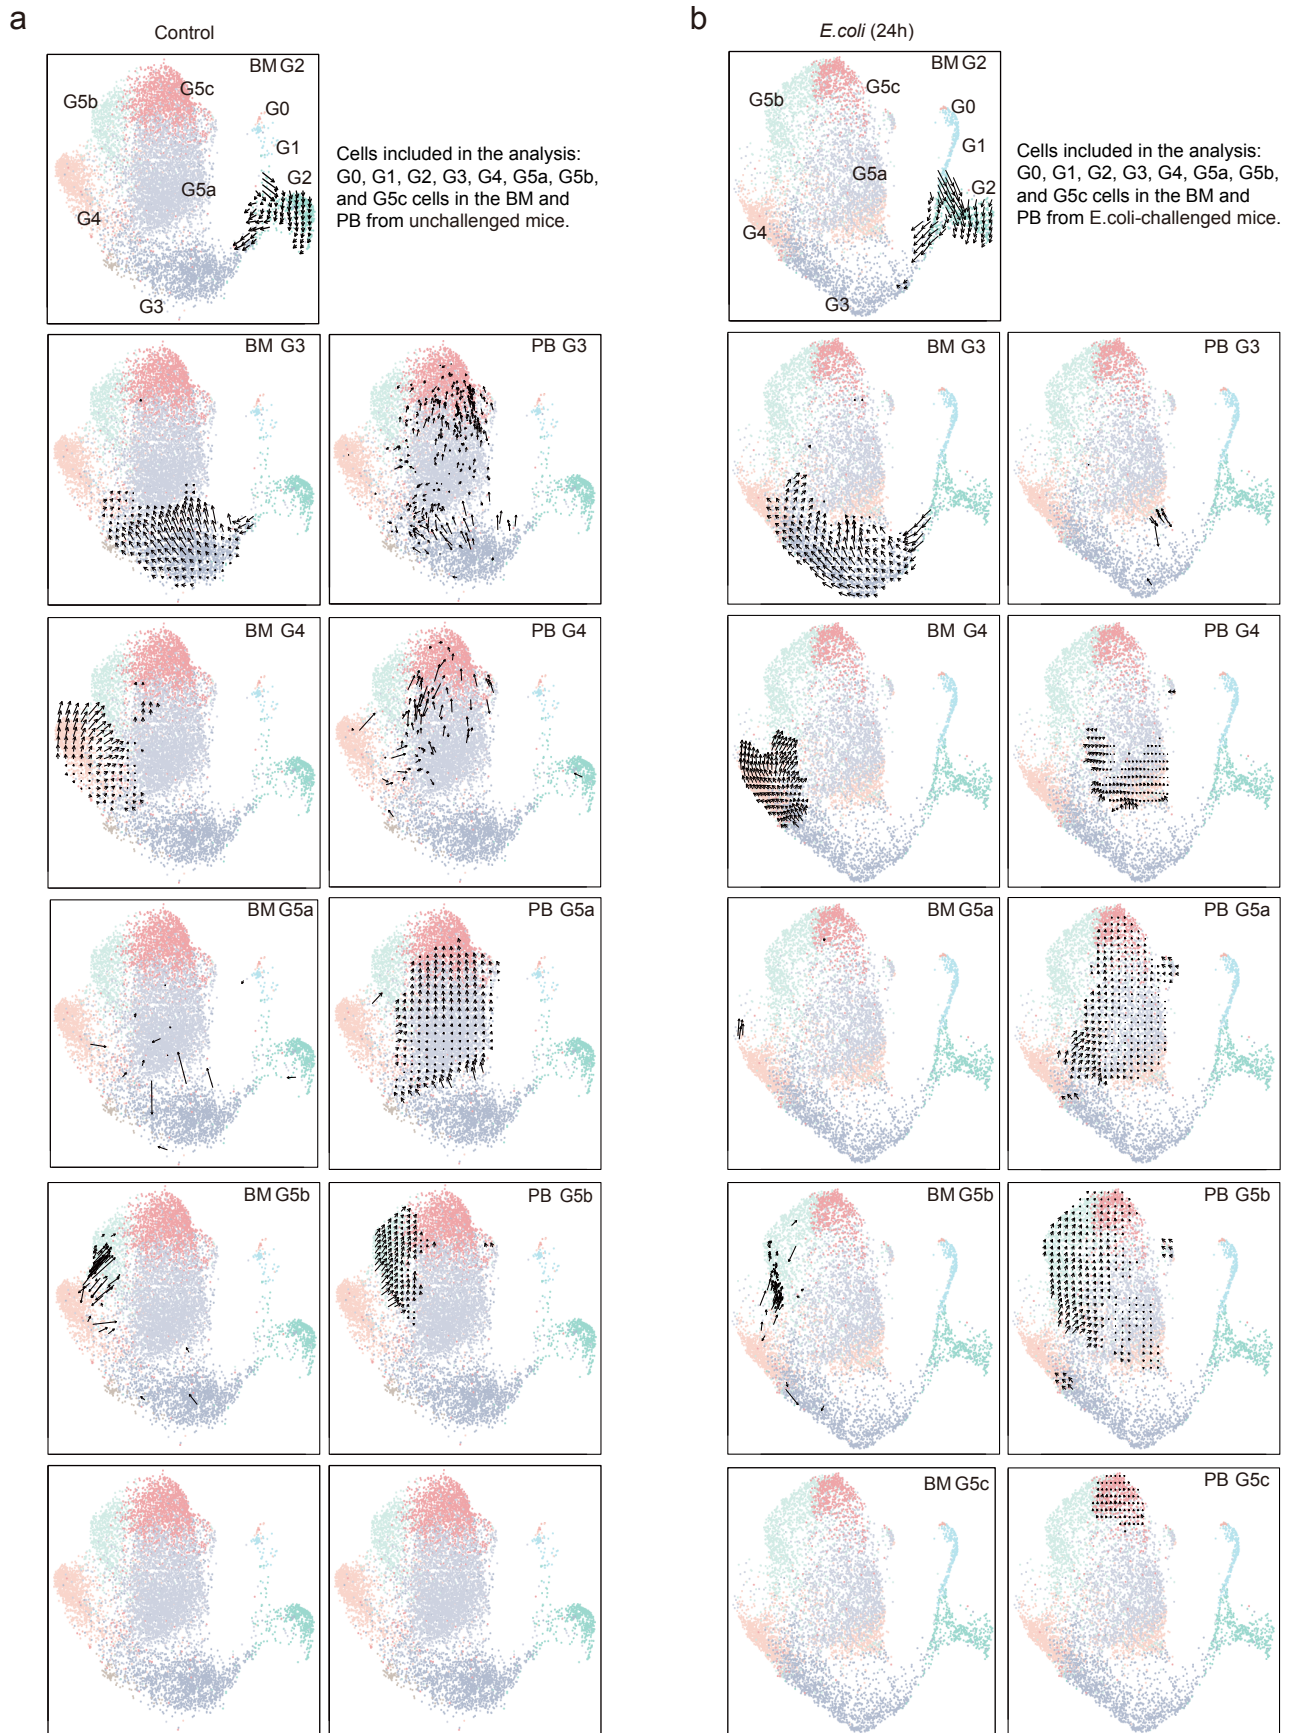

**Supplementary Fig. 5. Neutrophil dynamics under steady-state and bacterial infection conditions assessed by velocity analysis (all neutrophil populations were included for analysis). The analysis was conducted as described in Supplementary Fig. 3.**

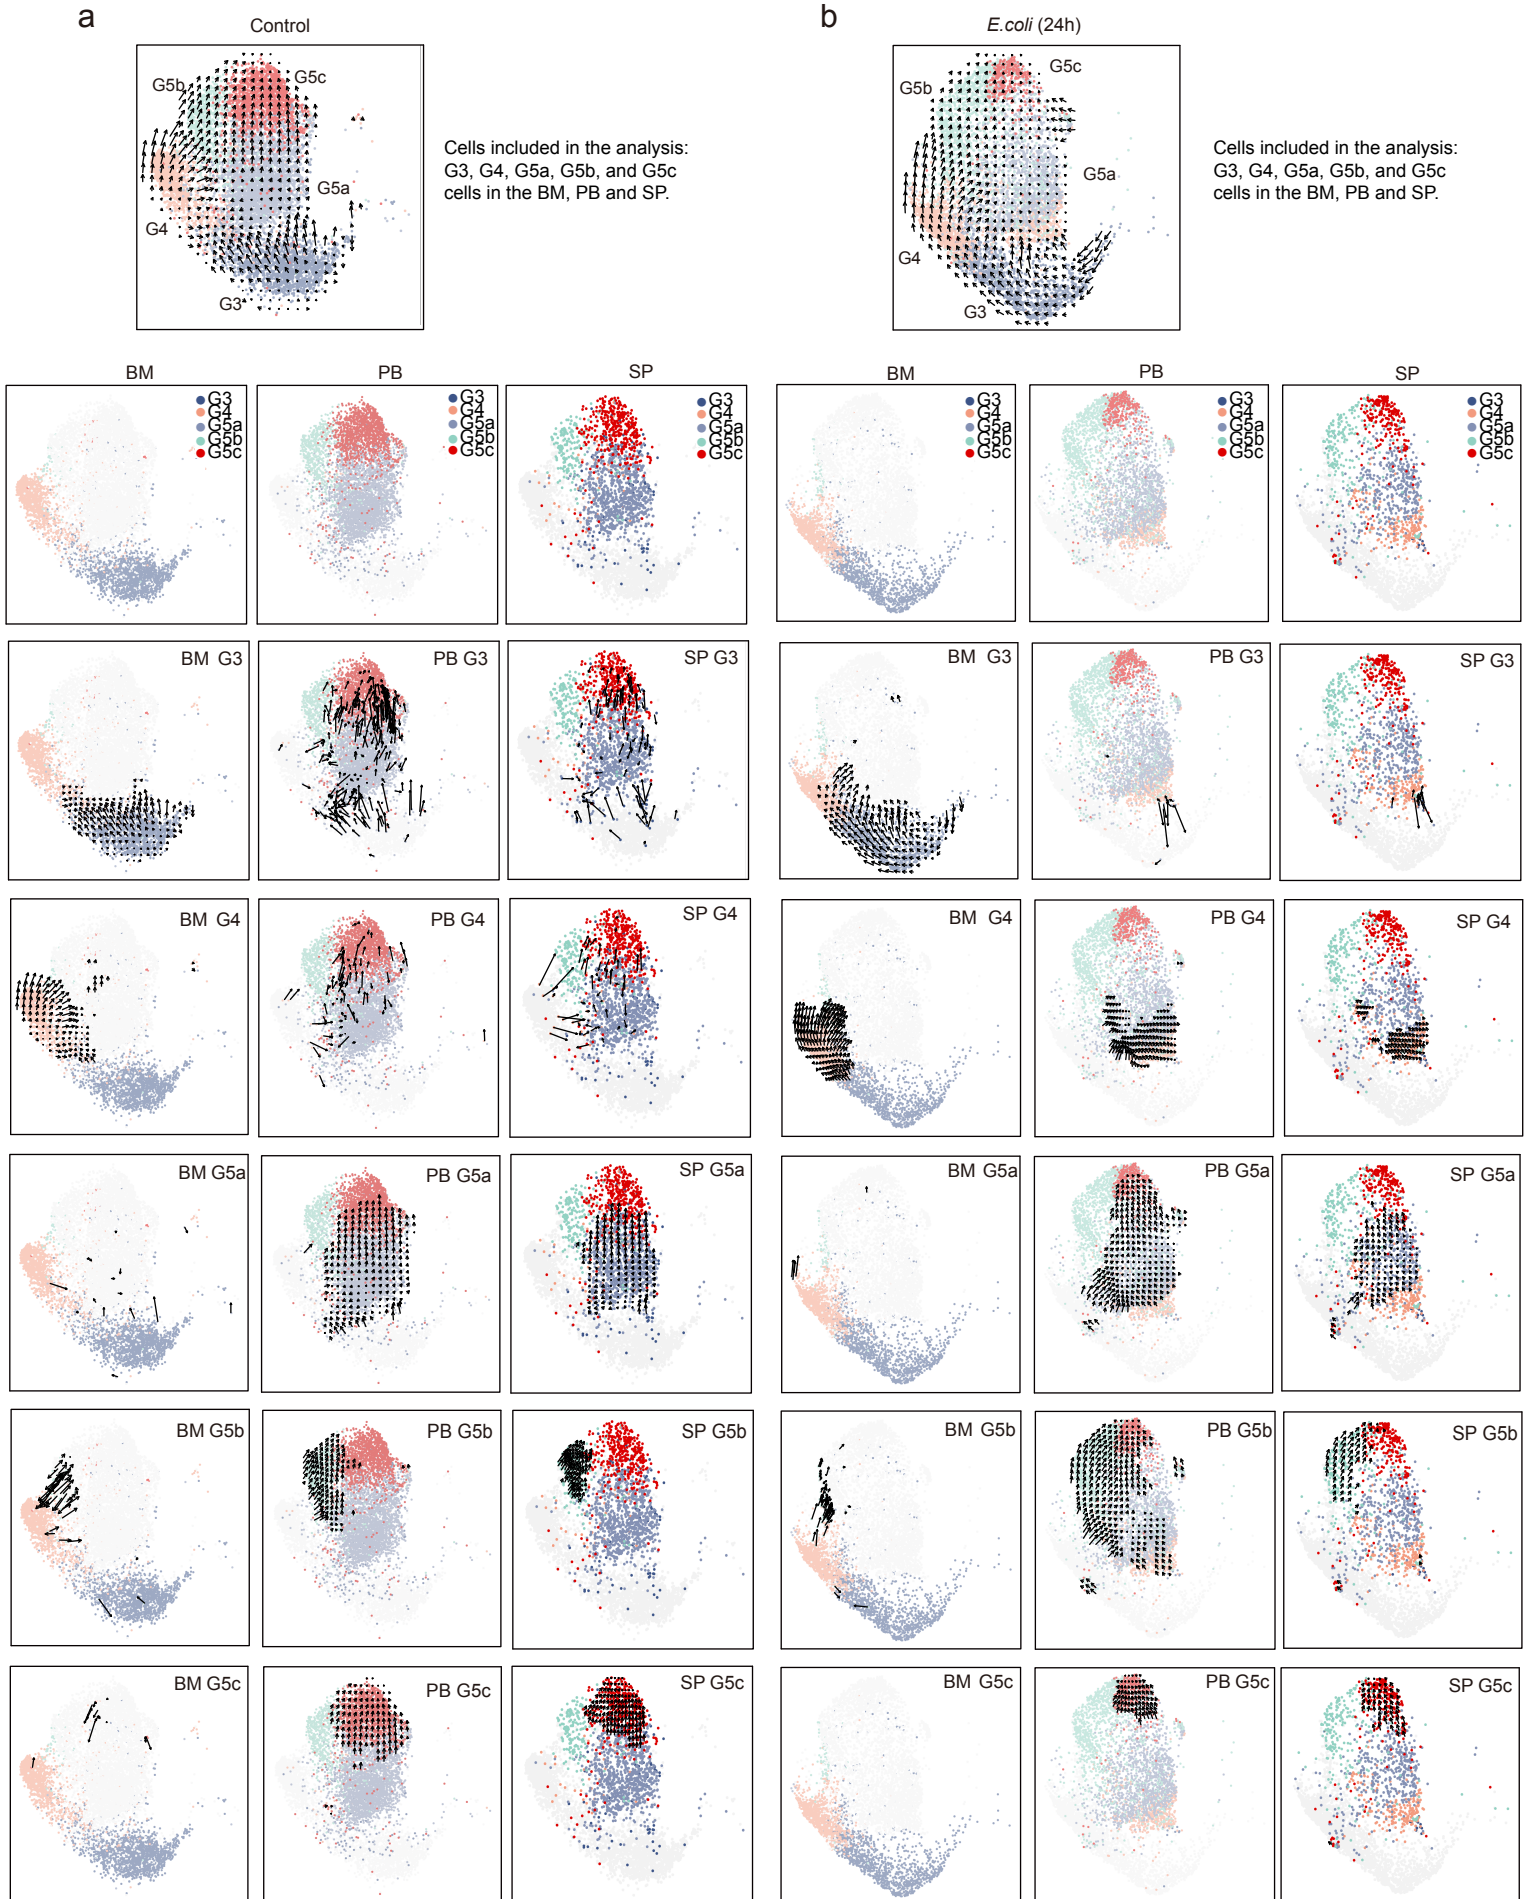

**Supplementary Fig. 6. Neutrophil dynamics under steady-state and bacterial infection conditions assessed by velocity analysis (only G3-G5 neutrophil populations were included for analysis).**  
The analysis was conducted as described in Supplementary Fig. 4.



*E.coli* (24h)

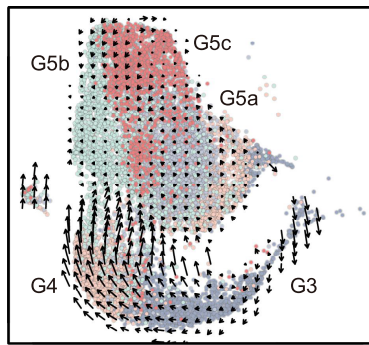

Cells included in the analysis:  
G3, G4, G5a, G5b, and G5c  
cells in the BM, PB, SP and PC.

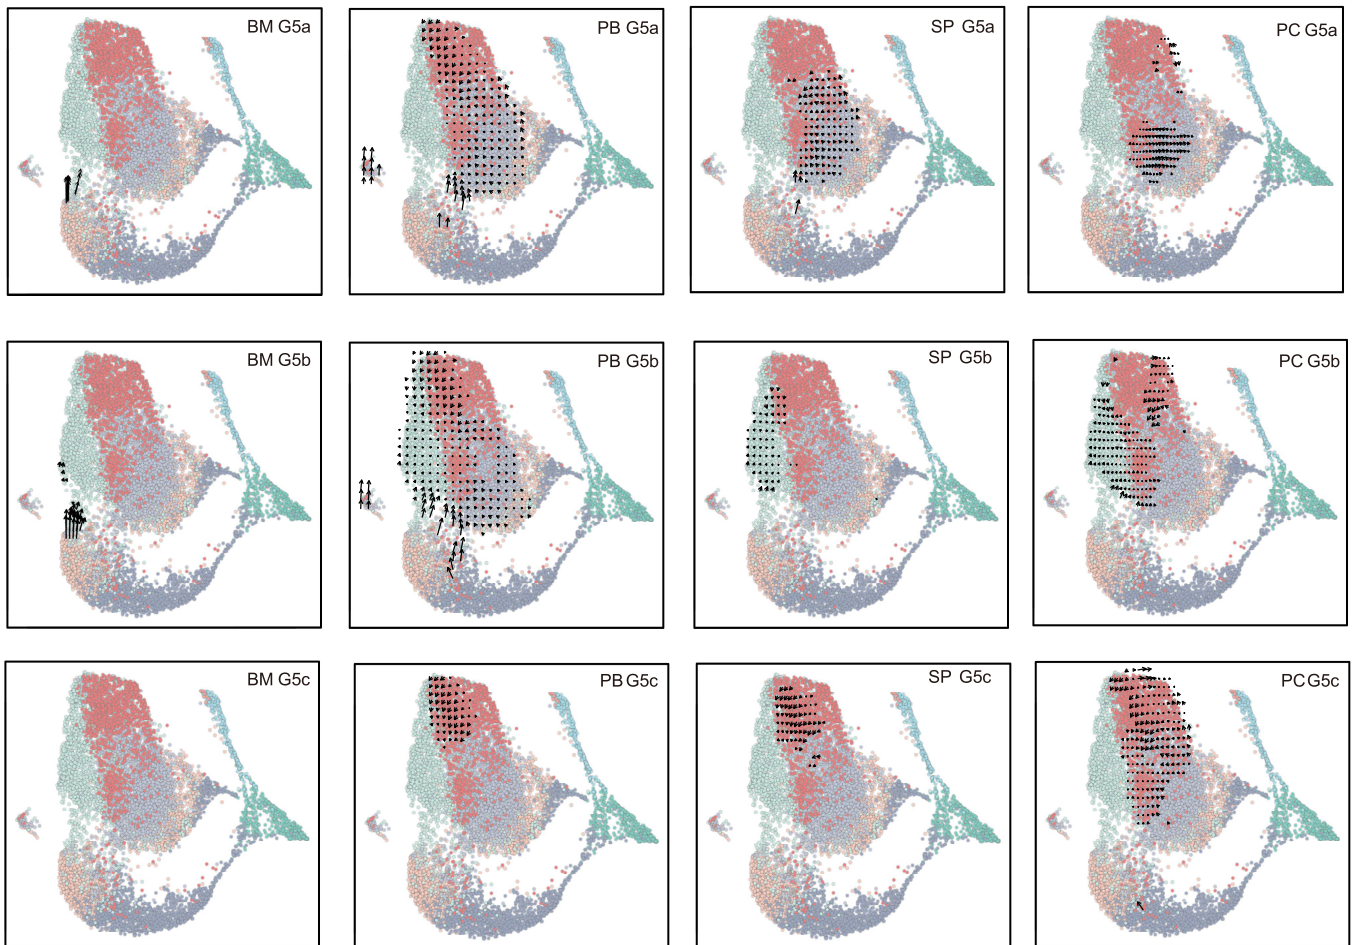

**Supplementary Fig. 7. Dynamics of G5 neutrophils during bacterial infection assessed by velocity analysis.** G3-G5 neutrophils from BM-Gr1+, PB-Gr1+, SP-Gr1+ and PC-Gr1+ samples (*E.coli* challenged) were subjected to RNA velocity analysis. Upper: Velocity analysis revealing the origin and inter-relationship of neutrophil subpopulations. Velocity fields were projected onto the UMAP plot. Lower: Visualization of RNA velocity analysis results. G5 subpopulations in the BM, PB, SP and PC are displayed separately.

**a**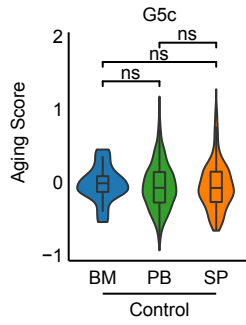**b**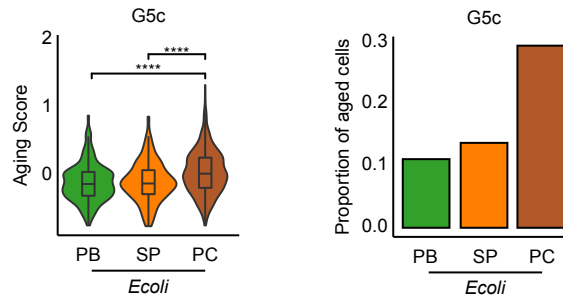

**Supplementary Fig. 8. Organ specific aging property of G5c neutrophils. (a)** Violin plot of aging score defined as weighted average Z-scores of aging-related genes for control (unchallenged) G5c neutrophils across organs. **(b)** Left: Violin plot of aging score defined as weighted average Z-scores of aging-related genes for *E. coli*-challenged G5c neutrophils across organs. Right: Proportion of aged cells in G5c population across organs. ns,  $P > 0.05$ ; \*,  $P \leq 0.05$ ; \*\*,  $P \leq 0.01$ ; \*\*\*,  $P < 0.001$ , \*\*\*\*,  $P \leq 0.0001$ . Student's t-test.
